# Supplementary material for: Coriolis Recovery of Wind Farm Wakes
Source: Copernicus journal article supplement (doi:10.5194/wes-2025-60), 2025-04-14
Supplement: Supplementary file [file wes-2025-60-AC3-supplement.pdf]

General comments on the two reviews.

The main part of this paper (Sections 4-8) describes the fluid dynamics of how the Coriolis force can act to recover the wake and how it interacts with stratification. This material is unique to our paper and fundamental to wake dynamics. Neither reviewer commented on these sections of the paper. Either they did not read it or they found it to be correct and not worthy of comment.

There are several closed form expressions in the paper regarding Coriolis wake recovery. (e.g. 31,32, 38, 45) . These formulae allow the reader to enter their favorite parameter values and see how it impacts certain wake aspects. Neither reviewer mentions or tries to use these formulae.

The main phenological discovery in the paper was the outer wake acceleration which in some cases is concentrated into the “edge jet”. We found that symmetric edge jets can be created by a downstream directed Coriolis force acting on the leftward deflected flow. Neither reviewer commented on this idea. Outer wake acceleration is perhaps illustrated on this figure from [Finseras et al, \(Marine Policy\) 2023](#). In the lower part of this figure we see wakes with accelerated flow on either side. We don’t know yet whether the Coriolis force caused these accelerated regions.

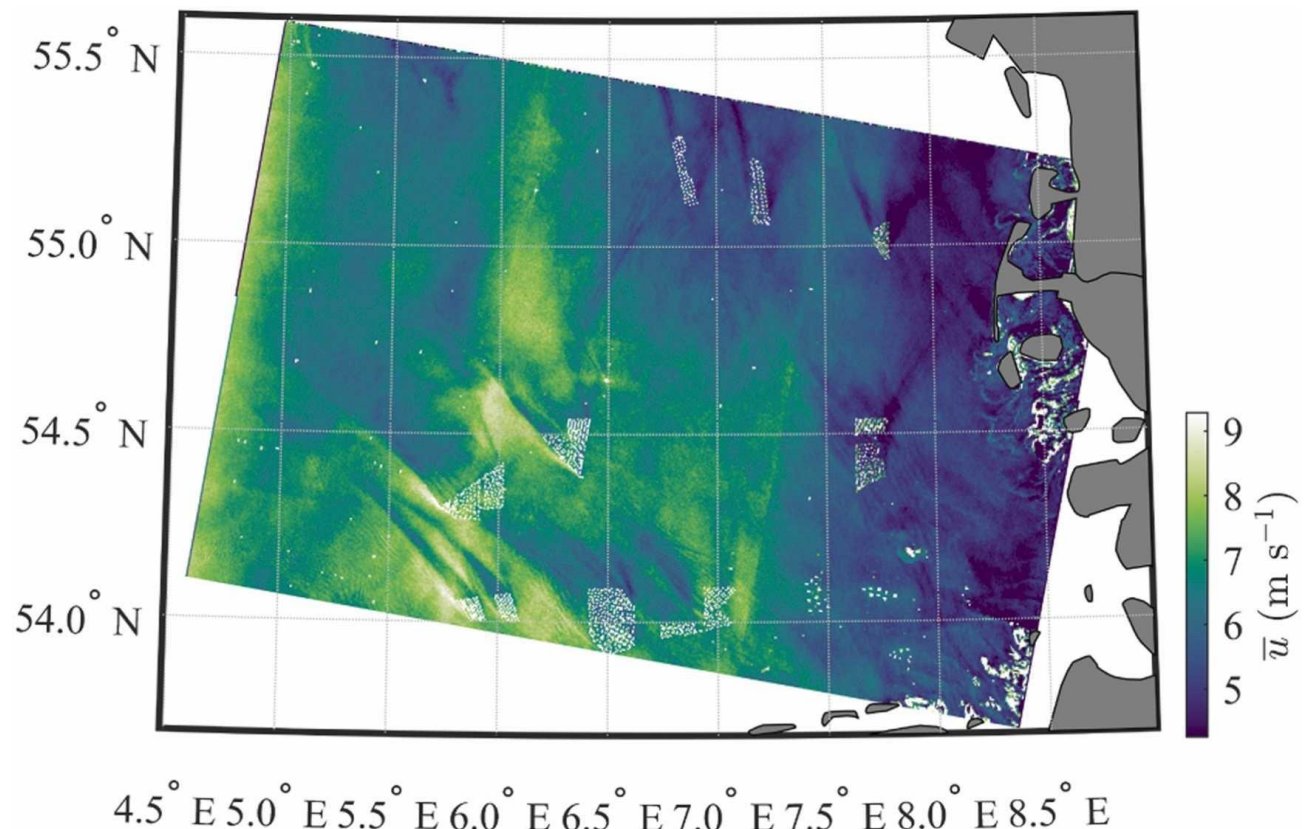

On other sections, they had some useful suggestions that we can use to improve the paper. They were interested in the question of how important Coriolis force is in real cases. Although we did discuss this important point, we do not think we can answer that question definitively, Parameter space is too large to make a global judgement of this type.
